# Supplementary material for: Proteins of Unknown Function in the Protein Data Bank (PDB): An Inventory of True Uncharacterized Proteins and Computational Tools for Their Analysis
Source: MDPI journal article supplement (doi:10.3390/ijms131012761), 2012-10-08
Supplement: s1 [file s1]

## Sheet: Sheet1
FILTER 1	FILTER 2	FILTER 3	FILTER 4
2549	1681	1303	1084
1DI6	1DM5	1EW4	1EW4
1DI7	1EW4	1G2R	1G2R
1DM5	1FL9	1HRU	1HRU
1EW4	1FUX	1IHN	1IHN
1F89	1G2R	1IN0	1IN0
1FL9	1HQQ	1IUK	1IUK
1FUX	1HRU	1IUL	1IUL	FILTER 1. Advanced search web interface for non-redundant X-ray crystallographic protein structures that are annotated as proteins of unknown function.
1G2R	1HTW	1IZM	1IZM
1GPQ	1HXL	1J27	1J27
1H2H	1HXZ	1J3M	1J3M
1HQQ	1HY2	1J3W	1J3W	FILTER 2. Proteins with no entry or annotation in the UniProtKB, along with entries that possess insufficient characterization.
1HRU	1I36	1J8B	1J8B
1HTW	1I9H	1JO0	1JO0
1HXL	1IHN	1JOG	1JOG
1HXZ	1IJ8	1JOP	1JOP	FILTER 3. Sequence similarity search using BLAST.
1HY2	1IN0	1JX7	1JX7
1I36	1IUK	1K3R	1K3R
1I60	1IUL	1K4N	1K4N
1I6N	1IXL	1K7J	1K7J	FILTER 4. Fold similarity search using DALI.
1I9H	1IZM	1KJN	1KJN
1IHN	1J27	1KK9	1KK9
1IJ8	1J2V	1KON	1KON
1ILV	1J3M	1KYH	1L1S
1IN0	1J3W	1L1S	1LXN
1IUJ	1J8B	1LXN	1M98
1IUK	1JAL	1M98	1MOG
1IUL	1JO0	1MOG	1MW5
1IXL	1JOG	1MW5	1MW7
1IZM	1JOP	1MW7	1MWQ
1J27	1JOV	1MWQ	1MWW
1J2R	1JRI	1MWW	1N81
1J2V	1JX7	1N81	1NC7
1J31	1JZT	1NC7	1NIG
1J3M	1K3R	1NIG	1NJH
1J3W	1K4N	1NJH	1NXH
1J6P	1K77	1NNW	1O22
1J74	1K7J	1NXH	1O3U
1J7D	1K8F	1O22	1O5U
1J8B	1KJN	1O3U	1OQ1
1J9J	1KK9	1O5U	1OYZ
1J9K	1KON	1OKJ	1OZ9
1J9L	1KYH	1OQ1	1P9I
1JAL	1L1S	1OYZ	1PC6
1JN1	1LCV	1OZ9	1PF5
1JO0	1LCW	1P9I	1PG6
1JOG	1LCZ	1PC6	1PM3
1JOP	1LDO	1PF5	1PUG
1JOV	1LDQ	1PG6	1PV5
1JRI	1LEL	1PM3	1Q4R
1JRK	1LJ7	1PUG	1Q7H
1JSX	1LJO	1PV5	1Q8C
1JX7	1LXN	1Q4R	1Q9U
1JYH	1M98	1Q7H	1QW2
1JZT	1MOG	1Q8C	1QYI
1K26	1MW5	1Q9U	1R0U
1K2E	1MW7	1QW2	1R75
1K3R	1MWQ	1QYI	1R7L
1K4N	1MWW	1R0U	1RFE
1K77	1MZG	1R5X	1RKI
1K7J	1N81	1R75	1RW1
1K7K	1NC7	1R7L	1RYL
1K8F	1NIG	1RC6	1S12
1KJN	1NIJ	1RCU	1S2X
1KK9	1NJH	1RFE	1S4C
1KON	1NMO	1RKI	1S7I
1KR4	1NMP	1RLH	1S7O
1KUU	1NNW	1RTW	1SED
1KYH	1NOG	1RV9	1SF9
1KYT	1NQM	1RW0	1SFS
1L0B	1NQN	1RW1	1SFX
1L1S	1NX4	1RYL	1SH8
1L5X	1NX8	1RZ2	1SJ5
1L6R	1NXH	1S12	1SQW
1LCV	1NZN	1S2X	1SS4
1LCW	1O22	1S4C	1SU0
1LCZ	1O3U	1S7I	1T06
1LDO	1O5U	1S7O	1T07
1LDQ	1OKJ	1SED	1T0B
1LEL	1OQ1	1SEF	1T0T
1LJ7	1OSC	1SF9	1T1J
1LJO	1OY1	1SFN	1T5Y
1LPL	1OYZ	1SFS	1T62
1LQL	1OZ9	1SFX	1T6A
1LXJ	1P99	1SH8	1T6T
1LXN	1P9I	1SJ5	1TD6
1M1S	1PC6	1SQ4	1TLJ
1M33	1PF5	1SQS	1TP6
1M3S	1PG6	1SQW	1TSJ
1M65	1PM3	1SS4	1TTZ
1M68	1PUG	1SU0	1TU1
1M98	1PV5	1T06	1TU9
1MK4	1Q4R	1T07	1TUH
1ML8	1Q7H	1T0B	1TWU
1MOG	1Q8C	1T0T	1TXL
1MW5	1Q9U	1T1J	1TZA
1MW7	1QW2	1T57	1U69
1MWQ	1QYI	1T5Y	1U6L
1MWW	1R0U	1T62	1U7I
1MZG	1R4V	1T6A	1U84
1N1Q	1R5X	1T6T	1U9D
1N81	1R75	1T8H	1UCR
1NC5	1R7L	1TD6	1V70
1NC7	1RC6	1TEL	1V8D
1NE2	1RCU	1TLJ	1V8H
1NE8	1RFE	1TP6	1VAJ
1NF2	1RKI	1TSJ	1VDH
1NG6	1RLH	1TTZ	1VGG
1NI9	1RLJ	1TU1	1VI7
1NIG	1RTT	1TU9	1VJL
1NIJ	1RTW	1TUH	1VK1
1NJH	1RV9	1TWU	1VK5
1NJK	1RW0	1TXL	1VM0
1NJR	1RW1	1TZA	1VPQ
1NKQ	1RXH	1U05	1VPY
1NKV	1RXJ	1U69	1VQY
1NMN	1RXK	1U6L	1VR4
1NMO	1RYL	1U7I	1WDJ
1NMP	1RZ2	1U84	1WEH
1NNH	1S12	1U9C	1WEK
1NNQ	1S2X	1U9D	1WJ9
1NNW	1S4C	1UAN	1WK2
1NNX	1S4K	1UCR	1WMM
1NO5	1S5A	1UF3	1WN9
1NOG	1S7I	1V70	1WNA
1NPD	1S7O	1V8D	1WOL
1NPY	1S9U	1V8H	1WPB
1NQM	1SED	1VAJ	1WSC
1NQN	1SEF	1VDH	1WTY
1NR9	1SF9	1VGG	1WV3
1NRI	1SFN	1VHO	1WV8
1NRK	1SFS	1VHU	1WV9
1NS5	1SFX	1VI7	1WWP
1NU0	1SG9	1VJL	1WXQ
1NX4	1SH8	1VK1	1WY6
1NX8	1SJ5	1VK5	1X6I
1NXH	1SMB	1VM0	1X6J
1NXJ	1SQ4	1VPH	1XE1
1NXZ	1SQS	1VPQ	1XE7
1NY1	1SQW	1VPY	1XE8
1NYE	1SR0	1VQR	1XG8
1NZA	1SS4	1VQY	1XHN
1NZJ	1SU0	1VR4	1XJC
1NZN	1T06	1WDJ	1XPJ
1O22	1T07	1WEH	1XQ4
1O3U	1T0B	1WEK	1XQA
1O5J	1T0T	1WJ9	1XQB
1O5U	1T1J	1WK2	1XSV
1O61	1T57	1WMM	1XVS
1O62	1T5Y	1WN9	1XY7
1O65	1T62	1WNA	1Y0K
1O67	1T6A	1WOL	1Y0N
1O69	1T6T	1WPB	1Y2I
1O6D	1T8H	1WSC	1Y8A
1O89	1T9F	1WTY	1YAV
1O8C	1TD6	1WU8	1YB3
1OJ7	1TEL	1WV3	1YBX
1OKJ	1TLJ	1WV8	1YCY
1ON0	1TP6	1WV9	1YHF
1OQ1	1TSJ	1WVQ	1YLL
1ORU	1TTZ	1WWP	1YLM
1OSC	1TU1	1WXQ	1YLN
1OY1	1TU9	1WY6	1YLX
1OYZ	1TUA	1X6I	1YOC
1OZ9	1TUH	1X6J	1YOX
1P1L	1TWU	1XAF	1YOZ
1P1M	1TXJ	1XE1	1YQH
1P5F	1TXL	1XE7	1YUD
1P8C	1TZA	1XE8	1YZY
1P99	1U05	1XFI	1Z0P
1P9I	1U61	1XFJ	1Z67
1P9Q	1U69	1XG8	1Z6M
1PB0	1U6L	1XHN	1Z6N
1PBJ	1U7I	1XJC	1ZBP
1PC6	1U84	1XPJ	1ZCE
1PD3	1U9C	1XQ4	1ZD0
1PF5	1U9D	1XQA	1ZEL
1PG6	1UAN	1XQB	1ZHV
1PM3	1UCR	1XSV	1ZKE
1PQY	1UF3	1XVS	1ZN6
1PT5	1UMJ	1XWM	1ZNO
1PT7	1V70	1XY7	1ZNP
1PT8	1V8D	1Y0K	1ZPV
1PUG	1V8H	1Y0N	1ZQ7
1PV5	1V99	1Y1X	1ZSO
1PVM	1V9B	1Y2I	1ZSW
1PW5	1VAJ	1Y8A	1ZTD
1Q2Y	1VBK	1YAV	1ZTP
1Q4R	1VDH	1YB3	1ZTV
1Q77	1VGG	1YBX	1ZVP
1Q7H	1VHM	1YCY	1ZWY
1Q8B	1VHO	1YHF	1ZX8
1Q8C	1VHQ	1YKW	2A1V
1Q9U	1VHU	1YLL	2A2L
1QVV	1VI3	1YLM	2A5Z
1QVW	1VI7	1YLN	2A8E
1QVZ	1VJL	1YLX	2AB1
1QW2	1VK1	1YOC	2AEG
1QY9	1VK5	1YOX	2AMH
1QYA	1VKA	1YOY	2AO9
1QYI	1VM0	1YOZ	2AP3
1QZ4	1VMF	1YQH	2AP6
1QZ8	1VMH	1YUD	2APL
1R0U	1VPH	1YX1	2ARH
1R3D	1VPQ	1YZY	2ARZ
1R4V	1VPY	1YZZ	2ASF
1R5X	1VQR	1Z0P	2ATZ
1R6Y	1VQY	1Z67	2AU5
1R75	1VR4	1Z6M	2AUA
1R7L	1VR9	1Z6N	2AUW
1R8G	1WDJ	1ZBM	2AXO
1RC6	1WEH	1ZBP	2B0A
1RCU	1WEK	1ZBR	2B1Y
1RFE	1WJ9	1ZBS	2B8M
1RFZ	1WK2	1ZCE	2BDT
1RI6	1WLU	1ZD0	2BDV
1RKI	1WLV	1ZEE	2BO3
1RKQ	1WM6	1ZEL	2CS7
1RLH	1WMM	1ZHV	2CU3
1RLJ	1WN3	1ZKD	2CU5
1RLK	1WN9	1ZKE	2CU6
1RTT	1WNA	1ZKI	2CWQ
1RTW	1WOL	1ZMB	2CWY
1RTY	1WOZ	1ZN6	2CXD
1RV9	1WPB	1ZNO	2CYJ
1RVK	1WR2	1ZNP	2CZ4
1RW0	1WSC	1ZPV	2CZ8
1RW1	1WTY	1ZQ7	2D4R
1RW7	1WU8	1ZSO	2D59
1RXD	1WV3	1ZSW	2D5A
1RXH	1WV8	1ZTD	2D9R
1RXJ	1WV9	1ZTP	2DBS
1RXK	1WVQ	1ZTV	2DCL
1RYL	1WVT	1ZVP	2DCT
1RZ2	1WWI	1ZWY	2DDZ
1RZ3	1WWP	1ZX8	2DEG
1S12	1WWS	1ZXO	2DEH
1S2X	1WXQ	2A1V	2DEV
1S4C	1WY6	2A2L	2DJW
1S4K	1X25	2A35	2DLB
1S5A	1X6I	2A5Z	2DP9
1S7H	1X6J	2A8E	2DPW
1S7I	1X77	2AB1	2DRV
1S7O	1XA0	2AEG	2DSY
1S8N	1XAF	2AJ2	2DT4
1S9U	1XB4	2AMH	2DVK
1SAW	1XBF	2AO9	2E6U
1SBK	1XE1	2AP3	2E6X
1SC0	1XE7	2AP6	2E87
1SD5	1XE8	2APL	2EBE
1SDI	1XFI	2ARH	2EBG
1SDJ	1XFJ	2ARZ	2EFF
1SED	1XG8	2ASF	2EFV
1SEF	1XHN	2ATZ	2EHP
1SEN	1XJC	2AU5	2EHW
1SF9	1XK8	2AUA	2EI5
1SFN	1XKL	2AUW	2EIU
1SFS	1XNF	2AXO	2EJ8
1SFX	1XPJ	2B0A	2EJQ
1SG9	1XQ4	2B1Y	2EJX
1SH8	1XQA	2B4W	2EKD
1SJ5	1XQB	2B6C	2EKY
1SMB	1XRG	2B8M	2EMQ
1SPV	1XSV	2BDT	2EPI
1SQ4	1XTL	2BDV	2ES9
1SQE	1XTM	2BO3	2ESH
1SQH	1XVS	2C5Q	2ETS
1SQS	1XWM	2CMU	2EUC
1SQU	1XX7	2CQZ	2EVV
1SQW	1XY7	2CS7	2EWC
1SR0	1Y0K	2CSU	2F20
1SS4	1Y0N	2CU3	2F4I
1SU0	1Y12	2CU5	2F4N
1SU1	1Y1X	2CU6	2F4P
1SYR	1Y2I	2CV9	2FB6
1T06	1Y63	2CW5	2FDO
1T07	1Y6Z	2CWQ	2FEF
1T0B	1Y7H	2CWY	2FFG
1T0T	1Y7I	2CXD	2FFJ
1T1J	1Y7P	2CYJ	2FFM
1T2B	1Y81	2CZ4	2FFS
1T3U	1Y88	2CZ8	2FGG
1T57	1Y8A	2CZL	2FI0
1T5J	1Y9I	2D13	2FIU
1T5R	1YAV	2D16	2FPN
1T5Y	1YB3	2D4R	2FTR
1T62	1YBX	2D59	2FU2
1T6A	1YCY	2D5A	2FYW
1T6S	1YHF	2D9R	2FYX
1T6T	1YKW	2DBI	2G0I
1T8H	1YLL	2DBN	2G0J
1T95	1YLM	2DBS	2G3V
1T9F	1YLN	2DCL	2G3W
1T9H	1YLO	2DCT	2G6T
1TC5	1YLX	2DDZ	2G7Z
1TD6	1YN5	2DEG	2G8L
1TE5	1YN8	2DEH	2GA1
1TEL	1YOA	2DEV	2GAX
1TLJ	1YOC	2DJW	2GBO
1TLQ	1YOX	2DLB	2GF4
1TO0	1YOY	2DP9	2GJV
1TO3	1YOZ	2DPW	2GK3
1TOV	1YQF	2DRV	2GKP
1TP6	1YQH	2DSY	2GMQ
1TPX	1YUD	2DT4	2GNX
1TQ5	1YX1	2DVK	2GPI
1TQ8	1YYV	2E6U	2GS5
1TQB	1YZ1	2E6X	2GSC
1TQC	1YZY	2E87	2GSV
1TQX	1YZZ	2EBE	2GTA
1TSJ	1Z0P	2EBG	2GTC
1TT4	1Z67	2ECE	2GTS
1TT7	1Z6M	2EFF	2GU3
1TTZ	1Z6N	2EFV	2GUJ
1TU1	1Z7U	2EHP	2GUK
1TU9	1ZBM	2EHW	2GX8
1TUA	1ZBP	2EI5	2GXF
1TUH	1ZBR	2EIU	2GZ4
1TUV	1ZBS	2EJ8	2H1T
1TUW	1ZCE	2EJQ	2H36
1TWU	1ZD0	2EJX	2H4O
1TWY	1ZEE	2EKD	2H5N
1TXJ	1ZEL	2EKM	2H6L
1TXL	1ZHV	2EKY	2HA9
1TXZ	1ZKD	2EMQ	2HD9
1TY8	1ZKE	2EPI	2HH6
1TZ0	1ZKI	2ES9	2HHG
1TZA	1ZMB	2ESH	2HIY
1TZZ	1ZN6	2ESN	2HJ1
1U05	1ZNO	2ETS	2HJM
1U0K	1ZNP	2EUC	2HLY
1U5W	1ZP6	2EVV	2HQ4
1U61	1ZPV	2EW0	2HQV
1U69	1ZPW	2EWC	2HQY
1U6L	1ZQ7	2F20	2HR2
1U7I	1ZS7	2F4I	2HRX
1U7N	1ZSO	2F4N	2HSB
1U84	1ZSW	2F4P	2HUH
1U9C	1ZTD	2FB6	2HUJ
1U9D	1ZTP	2FDO	2HWJ
1U9P	1ZTV	2FEF	2I15
1UAN	1ZUU	2FEX	2I1S
1UC2	1ZVP	2FFG	2I2L
1UCR	1ZWY	2FFJ	2I45
1UE8	1ZX8	2FFM	2I5H
1UF3	1ZXJ	2FFS	2I5U
1UF9	1ZXO	2FGG	2I6E
1UFA	1ZXU	2FI0	2I6H
1UFB	2A1V	2FIU	2I71
1UFH	2A2L	2FPN	2I7R
1UJ8	2A35	2FTR	2I8D
1UMJ	2A5B	2FU2	2IA1
1UTU	2A5C	2FYW	2IA7
1UZ3	2A5Z	2FYX	2IAB
1V30	2A8E	2FZV	2IAZ
1V6H	2A8G	2G0I	2IB0
1V6T	2A9S	2G0J	2IBO
1V70	2AB1	2G3V	2ICG
1V8D	2AEG	2G3W	2ICU
1V8H	2AJ2	2G6T	2ID1
1V8O	2AMH	2G7U	2IDG
1V8P	2AO9	2G7Z	2IDL
1V96	2AP3	2G8L	2IEL
1V99	2AP6	2GA1	2IF6
1V9B	2APL	2GAX	2IFX
1VAJ	2AR1	2GBO	2IG8
1VBK	2ARH	2GF4	2IGS
1VBV	2ARZ	2GJU	2IIU
1VCT	2ASF	2GJV	2IJQ
1VDH	2ATZ	2GK3	2IJR
1VDW	2AU5	2GK4	2IKB
1VE3	2AUA	2GKP	2IKK
1VGG	2AUW	2GMQ	2IM8
1VGY	2AV4	2GNP	2IM9
1VH0	2AXO	2GNX	2IMH
1VH5	2AXP	2GPI	2IMJ
1VH6	2B0A	2GQF	2INB
1VH9	2B0R	2GS5	2IOJ
1VHC	2B1Y	2GSC	2IPQ
1VHE	2B4W	2GSV	2IQI
1VHF	2B6C	2GTA	2IS5
1VHK	2B8M	2GTC	2IT2
1VHM	2BA2	2GTS	2IT3
1VHN	2BDT	2GU3	2IT9
1VHO	2BDV	2GUJ	2JB7
1VHQ	2BE4	2GUK	2JEK
1VHS	2BO3	2GUU	2NLV
1VHU	2C5Q	2GX8	2NN4
1VHY	2CMU	2GXF	2NR5
1VI1	2CQZ	2GZ4	2NR7
1VI3	2CS7	2H1T	2NRQ
1VI4	2CSL	2H36	2NS0
1VI7	2CSU	2H4O	2NS9
1VI8	2CU3	2H5N	2NV4
1VIM	2CU5	2H6L	2NVM
1VIV	2CU6	2HA9	2NVN
1VIZ	2CV9	2HD9	2NWA
1VJ1	2CVE	2HH6	2NWU
1VJK	2CVI	2HHG	2NWV
1VJL	2CVL	2HIY	2NX2
1VJX	2CW4	2HJ1	2NXO
1VK0	2CW5	2HJM	2NYD
1VK1	2CWQ	2HLY	2NYI
1VK5	2CWY	2HQ4	2NYS
1VK9	2CX0	2HQV	2NZC
1VKA	2CX1	2HQY	2O0P
1VM0	2CXD	2HR2	2O0Q
1VMF	2CYJ	2HRX	2O2A
1VMH	2CZ4	2HSB	2O30
1VPH	2CZ8	2HUH	2O34
1VPQ	2CZL	2HUJ	2O35
1VPY	2D13	2HWJ	2O3I
1VQR	2D16	2HZB	2O3L
1VQS	2D4R	2I15	2O4T
1VQW	2D59	2I1S	2O5A
1VQY	2D5A	2I2L	2O5H
1VR4	2D9R	2I3F	2O6K
1VR9	2DBI	2I45	2O6W
1W8I	2DBN	2I5H	2O8Q
1W9A	2DBS	2I5U	2O8S
1WD5	2DCL	2I6E	2O9X
1WD6	2DCT	2I6H	2OBK
1WDI	2DDZ	2I71	2OBN
1WDJ	2DEG	2I76	2OC6
1WDT	2DEH	2I7R	2OD0
1WDV	2DEV	2I8D	2OD4
1WEH	2DF8	2IA1	2OD6
1WEK	2DJW	2IA7	2ODK
1WHZ	2DLB	2IAB	2ODM
1WJ9	2DP9	2IAZ	2OEB
1WK2	2DPW	2IB0	2OEE
1WK4	2DR3	2IBO	2OEQ
1WKC	2DRV	2ICG	2OEZ
1WLU	2DST	2ICU	2OGF
1WLV	2DSY	2ID1	2OGK
1WLZ	2DT4	2IDG	2OHW
1WM6	2DUY	2IDL	2OJL
1WMM	2DVK	2IEL	2OKQ
1WN3	2DX6	2IF6	2OLT
1WN9	2DYY	2IFA	2OO2
1WNA	2E5F	2IFX	2OO3
1WOL	2E66	2IG8	2OOJ
1WOZ	2E6U	2IGS	2OOK
1WPB	2E6X	2IIU	2OQM
1WR2	2E87	2IIZ	2OT9
1WSC	2EA9	2IJQ	2OTA
1WTY	2EBE	2IJR	2OTM
1WU8	2EBG	2IKB	2OUF
1WUE	2ECE	2IKK	2OWP
1WUF	2EFF	2IM8	2OX7
1WV3	2EFV	2IM9	2OY9
1WV8	2EHP	2IMH	2OYY
1WV9	2EHW	2IMJ	2OYZ
1WVI	2EI5	2INB	2OZJ
1WVQ	2EIS	2IOJ	2OZZ
1WVT	2EIU	2IPQ	2P06
1WWI	2EJ8	2IQI	2P0N
1WWP	2EJQ	2IS5	2P0T
1WWS	2EJX	2IT2	2P12
1WWZ	2EKD	2IT3	2P1A
1WXQ	2EKM	2IT9	2P1X
1WY6	2EKY	2JB7	2P2E
1X25	2EMQ	2JEK	2P2U
1X6I	2EPG	2NLV	2P3P
1X6J	2EPI	2NN4	2P3Y
1X77	2ES9	2NR4	2P5D
1X7F	2ESH	2NR5	2P5Z
1X7V	2ESN	2NR7	2P61
1X9G	2ETS	2NRQ	2P62
1XA0	2EUC	2NS0	2P84
1XAF	2EVE	2NS9	2P92
1XB4	2EVV	2NV4	2PCS
1XBF	2EW0	2NVM	2PD0
1XBV	2EWC	2NVN	2PD1
1XBW	2EXX	2NWA	2PD2
1XBX	2F06	2NWU	2PFW
1XBY	2F0R	2NWV	2PGC
1XBZ	2F20	2NX2	2PH0
1XCC	2F3L	2NXO	2PH7
1XDI	2F4I	2NYD	2PIF
1XE1	2F4N	2NYI	2PJQ
1XE7	2F4P	2NYS	2PJS
1XE8	2F4Z	2NZC	2PK7
1XFI	2F6S	2O0P	2PK8
1XFJ	2F9C	2O0Q	2PLG
1XFS	2FA8	2O1E	2PMB
1XG7	2FB6	2O2A	2PMR
1XG8	2FBE	2O30	2PPX
1XHN	2FCJ	2O34	2PSB
1XHO	2FDO	2O35	2PST
1XI6	2FEF	2O3I	2PTF
1XI8	2FEX	2O3L	2PV4
1XIZ	2FFG	2O4T	2PWW
1XJC	2FFJ	2O55	2PYQ
1XK8	2FFM	2O57	2PYT
1XKF	2FFS	2O5A	2PZZ
1XKL	2FGG	2O5H	2Q00
1XKQ	2FHQ	2O6K	2Q03
1XM5	2FI0	2O6W	2Q07
1XM7	2FIU	2O8Q	2Q0X
1XMT	2FIY	2O8S	2Q22
1XMX	2FNE	2O9X	2Q30
1XN4	2FPN	2OBK	2Q3L
1XNF	2FSX	2OBN	2Q3P
1XPJ	2FTR	2OC6	2Q3T
1XQ4	2FU2	2OD0	2Q3V
1XQ6	2FYW	2OD4	2Q48
1XQ9	2FYX	2OD6	2Q4K
1XQA	2FZV	2ODK	2Q4Q
1XQB	2G03	2ODM	2Q9R
1XRG	2G0I	2OEB	2QAS
1XRI	2G0J	2OEE	2QAZ
1XS0	2G0Y	2OEQ	2QDR
1XSV	2G2X	2OEZ	2QF9
1XTL	2G38	2OGF	2QG3
1XTM	2G3V	2OGK	2QGU
1XTO	2G3W	2OHW	2QGV
1XUV	2G6B	2OJH	2QH9
1XV2	2G6T	2OJL	2QHQ
1XVS	2G7U	2OKQ	2QIP
1XW8	2G7Z	2OLT	2QKP
1XWM	2G8L	2OO2	2QM2
1XX7	2GA1	2OO3	2QMM
1XXL	2GAX	2OOI	2QNG
1XY7	2GBO	2OOJ	2QNI
1Y0H	2GF4	2OOK	2QNT
1Y0K	2GJU	2OQM	2QNU
1Y0N	2GJV	2OT9	2QP2
1Y0Z	2GK3	2OTA	2QPV
1Y12	2GK4	2OTM	2QQZ
1Y1X	2GKP	2OUF	2QS7
1Y2I	2GMQ	2OWP	2QSB
1Y5H	2GNP	2OX7	2QSD
1Y63	2GNX	2OY9	2QSI
1Y6Z	2GPI	2OYR	2QSV
1Y71	2GQF	2OYS	2QTI
1Y7H	2GS5	2OYY	2QTP
1Y7I	2GSC	2OYZ	2QU8
1Y7M	2GSL	2OZJ	2QUP
1Y7P	2GSV	2OZZ	2QVO
1Y7R	2GTA	2P06	2QVT
1Y80	2GTC	2P0N	2QWV
1Y81	2GTS	2P0T	2QYA
1Y82	2GU3	2P0Y	2QYC
1Y88	2GUJ	2P12	2QYZ
1Y89	2GUK	2P1A	2QZB
1Y8A	2GUS	2P1X	2QZG
1Y8T	2GUU	2P2E	2QZI
1Y9B	2GUV	2P2U	2R1F
1Y9E	2GX8	2P3P	2R41
1Y9I	2GXF	2P3Y	2R47
1YAV	2GZ4	2P5D	2R4I
1YB2	2H1T	2P5Z	2R5S
1YB3	2H28	2P61	2R5X
1YBM	2H36	2P62	2R6U
1YBX	2H4O	2P6C	2R9I
1YCD	2H5N	2P6H	2RA9
1YCY	2H6L	2P84	2RAD
1YDF	2HA9	2P92	2RAQ
1YDH	2HD9	2PCS	2RBD
1YDM	2HE4	2PD0	2RBG
1YDW	2HEK	2PD1	2RCD
1YE5	2HH6	2PD2	2RDC
1YEM	2HHG	2PFW	2RDE
1YEY	2HIY	2PGC	2RE2
1YF9	2HJ1	2PGX	2RE3
1YHF	2HJM	2PH0	2RFR
1YKW	2HJS	2PH7	2RGQ
1YLK	2HLY	2PIF	2RJZ
1YLL	2HNG	2PJQ	2RLD
1YLM	2HQ4	2PJS	2UVP
1YLN	2HQ8	2PJZ	2V1L
1YLO	2HQV	2PK7	2VKJ
1YLX	2HQY	2PK8	2VKO
1YN4	2HR2	2PKW	2VWA
1YN5	2HRX	2PLG	2W56
1YN8	2HSB	2PMB	2WB7
1YOA	2HSI	2PMR	2WNY
1YOC	2HUH	2PPX	2WZ7
1YOX	2HUJ	2PSB	2X3D
1YOY	2HWJ	2PST	2X3M
1YOZ	2HZB	2PTF	2X3O
1YQE	2I0X	2PV4	2X4I
1YQF	2I15	2PVZ	2X5Q
1YQH	2I1S	2PW0	2X5R
1YRE	2I2L	2PWW	2XDJ
1YS9	2I3F	2PYQ	2XRH
1YTL	2I45	2PYT	2YQY
1YUD	2I52	2PZZ	2YSK
1YV9	2I5H	2Q00	2YWA
1YW1	2I5R	2Q03	2YX6
1YWF	2I5U	2Q07	2YXH
1YX1	2I6E	2Q0X	2YXY
1YYV	2I6H	2Q22	2YYB
1YZ1	2I6T	2Q30	2YYO
1YZV	2I71	2Q3L	2YZT
1YZY	2I76	2Q3P	2YZY
1YZZ	2I7R	2Q3T	2Z0R
1Z0P	2I8D	2Q3V	2ZBN
1Z1S	2I8E	2Q40	2ZBU
1Z40	2I9I	2Q48	2ZBV
1Z67	2IA0	2Q4K	2ZCA
1Z6M	2IA1	2Q4Q	2ZDJ
1Z6N	2IA7	2Q52	2ZOP
1Z7A	2IAB	2Q9R	3AA8
1Z7U	2IAI	2QAS	3AA9
1Z84	2IAZ	2QAZ	3AH6
1Z90	2IB0	2QDR	3B21
1Z94	2IBO	2QF9	3B47
1ZBM	2ICG	2QG3	3B49
1ZBO	2ICU	2QGU	3B4Q
1ZBP	2ID1	2QGV	3B4S
1ZBR	2IDG	2QGY	3B5O
1ZBS	2IDL	2QH9	3B5P
1ZC6	2IEC	2QHQ	3B64
1ZCE	2IEL	2QIP	3B73
1ZD0	2IF6	2QKP	3B77
1ZEE	2IFA	2QM2	3B7C
1ZEL	2IFX	2QMM	3B83
1ZHV	2IG8	2QNG	3B8L
1ZKD	2IGS	2QNI	3BB5
1ZKE	2IIU	2QNT	3BB6
1ZKI	2IIZ	2QNU	3BB9
1ZKP	2IJQ	2QP2	3BCW
1ZL0	2IJR	2QPV	3BDE
1ZMB	2IKB	2QQZ	3BE3
1ZN6	2IKK	2QS7	3BEE
1ZNO	2IM8	2QSB	3BEY
1ZNP	2IM9	2QSD	3BF4
1ZOX	2IMH	2QSI	3BGH
1ZP6	2IMJ	2QSV	3BGU
1ZPV	2INB	2QTI	3BH1
1ZPW	2INW	2QTP	3BHW
1ZQ7	2IOJ	2QU8	3BID
1ZS7	2IPQ	2QUP	3BK5
1ZSO	2IQI	2QVO	3BL4
1ZSW	2IS5	2QVT	3BLZ
1ZTD	2IT2	2QWV	3BN7
1ZTP	2IT3	2QX2	3BNV
1ZTV	2IT9	2QYA	3BQ9
1ZUU	2IVY	2QYC	3BQT
1ZVP	2JB7	2QYG	3BQX
1ZWJ	2JEK	2QYZ	3BRC
1ZWY	2NLV	2QZB	3BS4
1ZX3	2NN4	2QZG	3BT5
1ZX5	2NR4	2QZI	3BUU
1ZX8	2NR5	2R1F	3BVC
1ZXJ	2NR7	2R41	3BWW
1ZXO	2NRK	2R47	3BY7
1ZXU	2NRQ	2R4I	3BYQ
1ZYL	2NS0	2R5S	3BZ6
1ZZM	2NS9	2R5X	3BZB
2A13	2NV4	2R6S	3C0F
2A15	2NVM	2R6U	3C0U
2A1V	2NVN	2R9I	3C19
2A2L	2NWA	2RA9	3C2Q
2A33	2NWI	2RAD	3C3H
2A35	2NWU	2RAQ	3C4R
2A3Q	2NWV	2RBD	3C4S
2A5B	2NX2	2RBG	3C5P
2A5C	2NX4	2RCD	3C6V
2A5Z	2NXO	2RDC	3C8L
2A67	2NYD	2RDE	3C9P
2A6P	2NYI	2RE2	3CAX
2A8E	2NYS	2RE3	3CBN
2A8G	2NZC	2RFR	3CE8
2A9F	2O0P	2RGQ	3CEW
2A9S	2O0Q	2RJB	3CEX
2AB0	2O1E	2RJZ	3CG4
2AB1	2O2A	2RLD	3CJL
2ACA	2O30	2UVP	3CJX
2AEG	2O34	2V1L	3CNR
2AEU	2O35	2VKJ	3CNW
2AEV	2O38	2VKO	3CNX
2AFC	2O3I	2VL7	3CP3
2AH5	2O3L	2VWA	3CU3
2AJ2	2O4T	2W0M	3CUC
2AMH	2O55	2W56	3CVO
2AO9	2O57	2WB7	3CWX
2AP3	2O5A	2WE9	3CWY
2AP6	2O5H	2WEE	3CXJ
2APJ	2O62	2WNY	3CYG
2APL	2O6K	2WZ7	3D01
2AQW	2O6W	2X3D	3D0J
2AR1	2O8Q	2X3M	3D0W
2ARH	2O8S	2X3O	3D33
2ARZ	2O95	2X4I	3D37
2ASF	2O96	2X5Q	3D4R
2ATR	2O9X	2X5R	3D7A
2ATZ	2OBB	2X7P	3D7Q
2AU5	2OBK	2X7Q	3D82
2AUA	2OBN	2XDJ	3DB7
2AUW	2OC6	2XRH	3DB9
2AV4	2OCE	2YES	3DBY
2AXO	2OD0	2YQY	3DCA
2AXP	2OD4	2YSK	3DCL
2AZ4	2OD6	2YVT	3DCX
2AZP	2ODK	2YWA	3DEX
2AZW	2ODM	2YX6	3DF6
2B06	2OEB	2YXH	3DFU
2B0A	2OEE	2YXY	3DI4
2B0C	2OEQ	2YYB	3DJM
2B0R	2OEZ	2YYO	3DJW
2B0V	2OGF	2YZS	3DKA
2B1Y	2OGK	2YZT	3DL3
2B30	2OHW	2YZY	3DM8
2B3M	2OJH	2Z0R	3DMC
2B4W	2OJL	2Z13	3DN7
2B6C	2OKA	2ZBN	3DNH
2B6E	2OKQ	2ZBU	3DNX
2B78	2OLT	2ZBV	3DO9
2B8M	2OO2	2ZCA	3DQQ
2BA2	2OO3	2ZDJ	3DT5
2BAZ	2OOI	2ZOP	3DUE
2BBE	2OOJ	2ZZ8	3DUK
2BDT	2OOK	3AA8	3DXO
2BDV	2OQM	3AA9	3DZA
2BE4	2OT9	3AH6	3DZM
2BKN	2OTA	3AYT	3E0H
2BKO	2OTM	3AYV	3E0S
2BKP	2OUF	3B21	3E0Z
2BO3	2OWP	3B47	3E11
2C5Q	2OX6	3B49	3E56
2CMU	2OX7	3B4Q	3E8V
2CQZ	2OXJ	3B4S	3E98
2CS7	2OXK	3B57	3EAA
2CSL	2OY9	3B5M	3EBR
2CSU	2OYR	3B5O	3EBT
2CU3	2OYS	3B5P	3EC6
2CU5	2OYY	3B64	3EC9
2CU6	2OYZ	3B73	3ECF
2CUW	2OZJ	3B77	3EEA
2CV9	2OZZ	3B7C	3EFG
2CVB	2P06	3B83	3EGL
2CVE	2P0G	3B8L	3EHC
2CVI	2P0N	3B9C	3EJV
2CVL	2P0T	3BB5	3ELG
2CW4	2P0Y	3BB6	3EN8
2CW5	2P12	3BB9	3ENC
2CWQ	2P17	3BCW	3EO6
2CWY	2P1A	3BDE	3EOI
2CX0	2P1X	3BE3	3ER6
2CX1	2P2E	3BEE	3ER7
2CXD	2P2L	3BEY	3ERM
2CY2	2P2U	3BF4	3ERV
2CYJ	2P3P	3BFM	3ES1
2CZ4	2P3Y	3BGH	3ES4
2CZ8	2P5D	3BGK	3ESG
2CZL	2P5Z	3BGU	3ESI
2D13	2P61	3BH1	3ESM
2D16	2P62	3BHN	3EUR
2D4G	2P65	3BHW	3EW1
2D4O	2P6C	3BID	3EW2
2D4P	2P6H	3BIL	3EZ0
2D4R	2P6Y	3BK5	3F08
2D59	2P84	3BL4	3F14
2D5A	2P8T	3BLZ	3F1T
2D7V	2P92	3BN7	3F1Z
2D8O	2P9X	3BNV	3F3B
2D8P	2PAG	3BQ9	3F40
2D9R	2PCS	3BQT	3F42
2DB7	2PD0	3BQX	3F7C
2DBI	2PD1	3BRC	3F7E
2DBN	2PD2	3BS4	3FB9
2DBS	2PFW	3BT5	3FBQ
2DC4	2PGC	3BUU	3FCN
2DCL	2PGX	3BVC	3FD9
2DCT	2PH0	3BWS	3FDI
2DDZ	2PH7	3BWW	3FDJ
41245	2PHP	3BY7	3FEU
2DEG	2PIF	3BYQ	3FEZ
2DEH	2PIH	3BZ6	3FF2
2DEV	2PJQ	3BZB	3FF4
2DF8	2PJS	3C0F	3FGX
2DFA	2PJZ	3C0U	3FGY
2DGB	2PK7	3C19	3FH1
2DJW	2PK8	3C2Q	3FH3
2DLB	2PKT	3C3H	3FHK
2DOK	2PKW	3C4R	3FJS
2DP9	2PLG	3C4S	3FJV
2DPW	2PMB	3C5P	3FKA
2DR3	2PMR	3C6V	3FKQ
2DRH	2PMY	3C8L	3FLH
2DRV	2PNT	3C9P	3FLJ
2DST	2PPX	3CAX	3FMB
2DSY	2PSB	3CBN	3FNJ
2DT4	2PST	3CE8	3FOJ
2DUM	2PTF	3CER	3FRW
2DUY	2PV4	3CEW	3FSD
2DVK	2PVZ	3CEX	3FUY
2DX6	2PW0	3CFZ	3FX7
2DYY	2PWW	3CG1	3FXD
2E5F	2PYQ	3CG3	3FXE
2E66	2PYT	3CG4	3FXH
2E67	2PZZ	3CIJ	3FY6
2E6U	2Q00	3CJL	3FYB
2E6X	2Q02	3CJX	3FYF
2E87	2Q03	3CKJ	3G0K
2E8C	2Q07	3CKN	3G16
2E8E	2Q0X	3CKO	3G1J
2E8F	2Q17	3CKQ	3G6I
2EA9	2Q1H	3CKV	3G74
2EBE	2Q22	3CNR	3G8Z
2EBG	2Q30	3CNW	3GAA
2ECE	2Q3L	3CNX	3GAN
2EEN	2Q3P	3CP3	3GDW
2EFF	2Q3T	3CPG	3GF6
2EFV	2Q3V	3CU3	3GF8
2EGI	2Q40	3CUC	3GGN
2EGJ	2Q48	3CVO	3GH1
2EGR	2Q4K	3CWX	3GHJ
2EGT	2Q4M	3CWY	3GI7
2EHP	2Q4Q	3CXJ	3GK5
2EHW	2Q4U	3CYG	3GK6
2EI5	2Q52	3D01	3GMI
2EIS	2Q8O	3D0J	3GN3
2EIU	2Q9R	3D0W	3GOR
2EJ8	2Q9T	3D33	3GOZ
2EJQ	2QAS	3D37	3GQS
2EJX	2QAZ	3D4R	3GRD
2EKD	2QBW	3D7A	3GTZ
2EKM	2QDR	3D7L	3GZR
2EKY	2QEN	3D7Q	3H35
2EKZ	2QF9	3D82	3H3H
2EMQ	2QG3	3DB7	3H6P
2EPG	2QGU	3DB9	3H8U
2EPI	2QGV	3DBY	3H92
2ES9	2QGY	3DCA	3H9P
2ESH	2QH9	3DCD	3H9X
2ESN	2QHQ	3DCL	3HA4
2ETS	2QIP	3DCX	3HDT
2EUC	2QKP	3DDE	3HFI
2EUI	2QM0	3DEX	3HG9
2EVE	2QM2	3DF6	3HHL
2EVV	2QMM	3DF7	3HIX
2EW0	2QMW	3DFU	3HK4
2EWC	2QNG	3DI4	3HL6
2EXX	2QNI	3DJM	3HLZ
2F06	2QNT	3DJW	3HN5
2F0R	2QNU	3DKA	3HQX
2F1L	2QP2	3DL3	3HRG
2F20	2QPV	3DM8	3HSA
2F3L	2QQY	3DMC	3HTR
2F3O	2QQZ	3DN7	3HTY
2F4I	2QS7	3DNH	3HWU
2F4N	2QSB	3DNX	3HX1
2F4P	2QSD	3DO9	3HXL
2F4Z	2QSI	3DQQ	3HZP
2F6S	2QSV	3DS8	3I0T
2F6U	2QTI	3DSM	3I3U
2F6X	2QTP	3DT5	3I7T
2F7W	2QU8	3DTN	3I8N
2F7Y	2QUP	3DTO	3IBM
2F9C	2QVO	3DTZ	3IC8
2F9H	2QVT	3DUE	3IEE
2FA8	2QWV	3DUK	3IF4
2FB0	2QX2	3DXO	3IJM
2FB1	2QYA	3DZA	3IJT
2FB6	2QYC	3DZM	3IKB
2FBE	2QYG	3E0H	3ILM
2FBL	2QYZ	3E0S	3IMK
2FBM	2QZB	3E0X	3IMO
2FBN	2QZG	3E0Y	3IRB
2FCJ	2QZI	3E0Z	3IUK
2FCK	2R1F	3E11	3IV0
2FD7	2R41	3E29	3IWH
2FD9	2R47	3E48	3IX7
2FDO	2R4I	3E4V	3JQ0
2FDR	2R5S	3E56	3JR7
2FDS	2R5X	3E5Z	3JRT
2FE1	2R6O	3E61	3JYS
2FE7	2R6S	3E8P	3JZV
2FEF	2R6U	3E8V	3K0Y
2FEX	2R9I	3E98	3K12
2FFG	2RA2	3EAA	3K29
2FFI	2RA8	3EBR	3K5J
2FFJ	2RA9	3EBT	3K6E
2FFM	2RAD	3EC6	3K6O
2FFS	2RAQ	3EC9	3K7C
2FG1	2RB6	3ECF	3K8R
2FGG	2RBD	3EEA	3K9R
2FHP	2RBG	3EFG	3KAV
2FHQ	2RCD	3EGL	3KAW
2FI0	2RD1	3EHC	3KBY
2FIU	2RDC	3EII	3KDQ
2FIY	2RDE	3EIR	3KDR
2FKB	2RE2	3EIT	3KE2
2FML	2RE3	3EJA	3KG4
2FMU	2RFR	3EJV	3KGZ
2FNE	2RG4	3ELG	3KHN
2FO3	2RGQ	3EN8	3KJJ
2FPN	2RHM	3ENC	3KJK
2FR2	2RJB	3EO6	3KK4
2FSQ	2RJZ	3EOF	3KLU
2FSU	2RLD	3EOI	3KNY
2FSX	2UVP	3ER6	3KOP
2FTR	2UYJ	3ER7	3KQ5
2FU0	2UYK	3ERM	3KSP
2FU2	2UYN	3ERV	3KVP
2FWV	2UYP	3ES1	3KWL
2FYW	2V1L	3ES4	3KXA
2FYX	2V7S	3ESG	3KYE
2FZF	2VH3	3ESI	3KYG
2FZV	2VKJ	3ESM	3KZP
2G03	2VKO	3EU8	3KZT
2G0I	2VL7	3EUR	3L20
2G0J	2VWA	3EW1	3L5O
2G0Y	2W0M	3EW2	3L6I
2G2C	2W56	3EWN	3L9A
2G2N	2WB7	3EZ0	3L9T
2G2P	2WE9	3F08	3LAG
2G2X	2WEE	3F14	3LBB
2G38	2WM3	3F1T	3LD7
2G39	2WNY	3F1Z	3LEQ
2G3V	2WZ7	3F3B	3LFK
2G3W	2X3D	3F40	3LFX
2G40	2X3M	3F42	3LJN
2G6B	2X3O	3F7C	3LM3
2G6T	2X4I	3F7E	3LMF
2G7U	2X5Q	3F7X	3LML
2G7Z	2X5R	3F8H	3LMM
2G84	2X7P	3FB9	3LNL
2G8L	2X7Q	3FBQ	3LNO
2GA1	2XDJ	3FCN	3LO3
2GA8	2XM6	3FD9	3LOI
2GAA	2XRH	3FDI	3LQN
2GAN	2XUV	3FDJ	3LUP
2GAX	2Y3C	3FEU	3LW3
2GBO	2YES	3FEZ	3LWC
2GDQ	2YQY	3FF2	3LWG
2GF4	2YSK	3FF4	3LYD
2GFG	2YVT	3FGB	3LYG
2GFQ	2YWA	3FGE	3LYW
2GGE	2YX6	3FGX	3LZZ
2GH1	2YXH	3FGY	3M05
2GJU	2YXY	3FH1	3M33
2GJV	2YYB	3FH3	3M3I
2GK3	2YYO	3FHK	3M4R
2GK4	2YZS	3FJS	3M6J
2GKP	2YZT	3FJV	3M7A
2GL5	2YZY	3FKA	3M92
2GLU	2Z08	3FKQ	3MAB
2GM3	2Z09	3FLE	3MC3
2GMQ	2Z0R	3FLH	3MCX
2GMY	2Z13	3FLJ	3MFN
2GNP	2Z3V	3FMB	3MGJ
2GNX	2ZBN	3FNJ	3MLG
2GO8	2ZBU	3FOJ	3MLI
2GPI	2ZBV	3FRW	3MNF
2GPY	2ZCA	3FSD	3MQZ
2GQF	2ZDJ	3FUY	3MSW
2GS5	2ZFH	3FVW	3MW6
2GSC	2ZOP	3FX7	3MYX
2GSL	2ZZ8	3FXD	3MZZ
2GSV	3AA8	3FXE	3N2Q
2GSW	3AA9	3FXH	3N6Y
2GTA	3AB7	3FY6	3N99
2GTC	3AB8	3FYB	3NA2
2GTR	3AH6	3FYF	3NAT
2GTS	3AQG	3G0K	3NEK
2GU3	3AYT	3G16	3NHV
2GUJ	3AYV	3G17	3NI3
2GUK	3B21	3G1J	3NJC
2GUS	3B2A	3G6I	3NKG
2GUU	3B42	3G74	3NNG
2GUV	3B47	3G8Z	3NPD
2GWG	3B49	3GAA	3NPG
2GWN	3B4Q	3GAN	3NPP
2GX8	3B4S	3GDW	3NQK
2GXF	3B57	3GF6	3NQN
2GYQ	3B5M	3GF8	3NRF
2GZ4	3B5O	3GGN	3NRH
2GZX	3B5P	3GH1	3NRL
2H1T	3B64	3GHJ	3NWZ
2H28	3B73	3GI7	3NYM
2H2Y	3B77	3GIW	3O0L
2H36	3B7C	3GK5	3O2E
2H4O	3B83	3GK6	3O2I
2H5N	3B8L	3GMI	3O3K
2H6L	3B9C	3GN3	3O3W
2HA9	3BB5	3GN6	3O60
2HD9	3BB6	3GO4	3O6U
2HE4	3BB9	3GOR	3OAO
2HEK	3BCW	3GOZ	3OBH
2HH6	3BDE	3GQJ	3OHG
2HH7	3BE3	3GQM	3OKX
2HHG	3BEE	3GQS	3OL3
2HI1	3BEY	3GRD	3OL4
2HIA	3BF4	3GTZ	3OMD
2HIQ	3BFM	3GW4	3ONQ
2HIY	3BGH	3GZR	3OOP
2HJ1	3BGK	3H35	3OOU
2HJM	3BGU	3H3H	3OQQ
2HJS	3BH1	3H3L	3OT2
2HLY	3BHN	3H6P	3OV8
2HMC	3BHP	3H8U	3OWR
2HNE	3BHW	3H92	3P02
2HNG	3BID	3H9P	3P51
2HQ4	3BIL	3H9X	3P69
2HQ8	3BK5	3HA4	3P8A
2HQV	3BL4	3HBK	3P9V
2HQY	3BLZ	3HDG	3PES
2HR2	3BN7	3HDJ	3PF6
2HRX	3BNV	3HDT	3PH1
2HRZ	3BPD	3HFI	3PM7
2HSB	3BQ9	3HFQ	3POD
2HSI	3BQT	3HG9	3PON
2HSJ	3BQW	3HHL	3Q34
2HUH	3BQX	3HIX	3Q4H
2HUJ	3BRC	3HK4	3Q6C
2HV2	3BS4	3HL6	3Q9D
2HV6	3BT3	3HLZ	3QFG
2HV7	3BT5	3HN5	3QH6
2HWJ	3BUU	3HQX	3QH7
2HXT	3BVC	3HRG	3QKB
2HXU	3BWS	3HRP	3QOO
2HYX	3BWW	3HSA	3QSZ
2HZB	3BY7	3HTR	3QTH
2I0M	3BYQ	3HTY	3R79
2I0X	3BZ6	3HWU	3RAG
2I15	3BZB	3HX1	3RD4
2I1S	3C0F	3HXL	3RH3
2I2L	3C0U	3HZP	3RHT
2I2O	3C19	3I0T	3RMQ
2I3D	3C2Q	3I3F	3RMS
2I3F	3C3F	3I3U	3RNS
2I45	3C3G	3I7T	3ROB
2I52	3C3H	3I8N	3RQA
2I5E	3C4N	3IBM	3S25
2I5H	3C4R	3IC8	3S5T
2I5R	3C4S	3IEE	3S6S
2I5T	3C5O	3IF4	3S6U
2I5U	3C5P	3IJM	3S6V
2I6E	3C6F	3IJT	3S9J
2I6H	3C6V	3IKB	3S9X
2I6R	3C8C	3ILM	3SB1
2I6T	3C8L	3IMK	3SB3
2I71	3C9P	3IMO	3SBU
2I76	3CA8	3IRB	3SD2
2I7R	3CAX	3IRH	3SJR
2I8D	3CBN	3IUK	3SLR
2I8E	3CE8	3IUV	3SOT
2I9C	3CER	3IV0	3SOZ
2I9I	3CEW	3IWH	3T8K
2I9X	3CEX	3IX7	3TOE
2I9Z	3CFY	3JQ0	3TU8
2IA0	3CFZ	3JR7	3TUA
2IA1	3CG1	3JRT	3TWE
2IA7	3CG3	3JS6	3TWF
2IA9	3CG4	3JYS	3TWG
2IAB	3CIJ	3JZV	3TZG
2IAF	3CIS	3K0Y	3U07
2IAI	3CJL	3K12	3U0I
2IAZ	3CJX	3K25	3U1D
2IB0	3CKJ	3K29	3U24
2IBD	3CKN	3K5J	3U5W
2IBO	3CKO	3K6E	3U66
2ICG	3CKQ	3K6O	3U6G
2ICU	3CKV	3K7C	3UC2
2ID1	3CLQ	3K8R	3UNG
2IDG	3CNR	3K9R	3UPS
2IDL	3CNU	3KAV	3UR3
2IEC	3CNW	3KAW	3USH
2IEE	3CNX	3KBY	3UT4
2IEL	3CP3	3KD3	3UT7
2IF6	3CPG	3KDQ	3UT8
2IFA	3CPK	3KDR	3V4H
2IFX	3CSX	3KE2	3V7B
2IG8	3CU3	3KG4	3VG8
2IGL	3CUC	3KGZ	4DCI
2IGS	3CVO	3KHN	4DLH
2IIU	3CWQ	3KJJ	4DPO
2IIZ	3CWX	3KJK	4DQA
2IJC	3CWY	3KK4	4DSD
2IJQ	3CXJ	3KLU	4DWE
2IJR	3CYG	3KNY	4E0E
2IKB	3D01	3KOP	4E2G
2IKK	3D0J	3KQ5	4E5V
2IL5	3D0W	3KSP	4E72
2IM8	3D19	3KVP	4E9K
2IM9	3D30	3KWL	4EAE
2IMH	3D33	3KXA	4EG9
2IMJ	3D37	3KYE	4EGD
2IMR	3D4R	3KYF	4EUY
2INB	3D79	3KYG	4F3N
2INW	3D7A	3KZP
2IOJ	3D7L	3KZT
2IPQ	3D7Q	3L1W
2IQI	3D82	3L20
2IS5	3DB7	3L5O
2IT2	3DB9	3L6I
2IT3	3DBY	3L9A
2IT9	3DCA	3L9T
2IVY	3DCD	3LAG
2JB7	3DCL	3LBB
2JEK	3DCX	3LBE
2NLV	3DDE	3LD7
2NLY	3DEX	3LEQ
2NLZ	3DF6	3LFK
2NN4	3DF7	3LFT
2NN5	3DFU	3LFX
2NQL	3DI4	3LJN
2NQW	3DJM	3LLX
2NR4	3DJW	3LM3
2NR5	3DKA	3LMB
2NR7	3DL1	3LMF
2NRH	3DL2	3LML
2NRK	3DL3	3LMM
2NRQ	3DM8	3LNL
2NS0	3DMC	3LNO
2NS9	3DME	3LO3
2NUH	3DMY	3LOI
2NV4	3DN7	3LQN
2NVM	3DNH	3LUP
2NVN	3DNX	3LW3
2NVP	3DO9	3LWC
2NWA	3DQQ	3LWG
2NWI	3DRX	3LYD
2NWU	3DRY	3LYG
2NWV	3DRZ	3LYW
2NX2	3DS8	3LZZ
2NX4	3DSG	3M05
2NXO	3DSM	3M0F
2NYD	3DT5	3M33
2NYG	3DTD	3M3I
2NYI	3DTN	3M4R
2NYS	3DTO	3M6J
2NZC	3DTZ	3M7A
2O0P	3DUE	3M92
2O0Q	3DUK	3MAB
2O14	3DXO	3MC3
2O16	3DZA	3MCX
2O1E	3DZM	3MER
2O1M	3E0H	3MFN
2O1O	3E0S	3MGJ
2O2A	3E0X	3MLG
2O30	3E0Y	3MLI
2O34	3E0Z	3MNF
2O35	3E11	3MQZ
2O38	3E18	3MSW
2O3A	3E29	3MUQ
2O3I	3E48	3MW6
2O3L	3E4V	3MYX
2O4D	3E56	3MZZ
2O4T	3E5Z	3N2Q
2O55	3E61	3N6Y
2O56	3E8P	3N99
2O57	3E8V	3NA2
2O5A	3E98	3NAT
2O5H	3EAA	3NEK
2O62	3EB0	3NHV
2O6K	3EBR	3NI3
2O6W	3EBT	3NJC
2O8I	3EC6	3NKG
2O8Q	3EC9	3NNG
2O8S	3ECF	3NO2
2O95	3EDP	3NPD
2O96	3EEA	3NPG
2O9X	3EEC	3NPP
2OA2	3EFG	3NQK
2OBB	3EGC	3NQN
2OBK	3EGL	3NRF
2OBN	3EHC	3NRH
2OC6	3EII	3NRL
2OCE	3EIR	3NRN
2OD0	3EIT	3NWZ
2OD4	3EJA	3NYM
2OD6	3EJV	3O0L
2ODF	3ELG	3O2E
2ODK	3EN2	3O2I
2ODM	3EN8	3O3K
2OEB	3ENC	3O3W
2OEE	3EO6	3O60
2OEQ	3EOF	3O6U
2OEZ	3EOI	3OAO
2OGF	3EOP	3OBH
2OGK	3ER6	3OCJ
2OHW	3ER7	3OHG
2OJH	3ERM	3OKX
2OJL	3ERV	3OL3
2OKA	3ES1	3OL4
2OKQ	3ES4	3OMD
2OLT	3ESG	3ONQ
2OO2	3ESI	3OOP
2OO3	3ESM	3OOU
2OOI	3EU8	3OQQ
2OOJ	3EUR	3OT2
2OOK	3EVI	3OV8
2OPL	3EVY	3OWR
2OQM	3EW1	3P02
2OT9	3EW2	3P51
2OTA	3EW7	3P69
2OTM	3EWN	3P8A
2OUF	3EZ0	3P9V
2OV8	3EZY	3PE5
2OVB	3F08	3PES
2OVF	3F14	3PF0
2OWP	3F1T	3PF6
2OX6	3F1Z	3PH1
2OX7	3F2V	3PM7
2OXJ	3F3B	3POD
2OXK	3F40	3PON
2OY9	3F42	3Q34
2OYN	3F7C	3Q4H
2OYR	3F7E	3Q6C
2OYS	3F7S	3Q9D
2OYY	3F7X	3QFG
2OYZ	3F86	3QH6
2OZ5	3F87	3QH7
2OZ8	3F8H	3QKB
2OZJ	3FB9	3QOO
2OZZ	3FBQ	3QSG
2P06	3FCN	3QSL
2P0G	3FD9	3QSZ
2P0N	3FDI	3QTH
2P0O	3FDJ	3QVO
2P0T	3FDX	3R79
2P0V	3FEQ	3RAG
2P0Y	3FEU	3RD4
2P12	3FEZ	3RH3
2P13	3FF2	3RHT
2P17	3FF4	3RMQ
2P1A	3FGB	3RMS
2P1G	3FGE	3RNS
2P1X	3FGG	3ROB
2P2E	3FGX	3RQA
2P2L	3FGY	3RQB
2P2U	3FH0	3RS8
2P3P	3FH1	3RS9
2P3Y	3FH3	3RSF
2P4P	3FHK	3RSQ
2P5D	3FIF	3RSS
2P5I	3FJ1	3RT7
2P5X	3FJS	3RT9
2P5Z	3FJV	3RTA
2P61	3FKA	3RTC
2P62	3FKQ	3RTD
2P65	3FLE	3RTE
2P6C	3FLH	3RTG
2P6H	3FLJ	3RU3
2P6Y	3FMB	3S25
2P84	3FNJ	3S5T
2P8T	3FOJ	3S6S
2P90	3FRW	3S6U
2P92	3FSD	3S6V
2P9J	3FUY	3S9J
2P9M	3FVW	3S9X
2P9X	3FX7	3SB1
2PAG	3FXD	3SB3
2PCS	3FXE	3SBU
2PD0	3FXH	3SBX
2PD1	3FY6	3SD2
2PD2	3FYB	3SJR
2PFC	3FYF	3SLR
2PFS	3G0K	3SOT
2PFW	3G16	3SOZ
2PGC	3G17	3ST1
2PGX	3G1C	3T8K
2PH0	3G1J	3TOE
2PH7	3G6I	3TP4
2PHC	3G74	3TU8
2PHP	3G7G	3TUA
2PIF	3G7P	3TWE
2PIH	3G8Z	3TWF
2PJQ	3GAA	3TWG
2PJS	3GAN	3TZG
2PJZ	3GDW	3U07
2PK7	3GEK	3U0I
2PK8	3GF6	3U1D
2PKT	3GF8	3U24
2PKW	3GGN	3U4Y
2PLG	3GH1	3U5W
2PLI	3GHJ	3U66
2PLM	3GI7	3U6G
2PLS	3GIW	3UC2
2PMA	3GK5	3UN6
2PMB	3GK6	3UNG
2PMR	3GKX	3UPS
2PMY	3GMG	3UR3
2PNT	3GMI	3USH
2POD	3GN3	3UT4
2POZ	3GN6	3UT7
2PPX	3GNL	3UT8
2PQ0	3GO4	3V4H
2PQV	3GOR	3V7B
2PS2	3GOZ	3VDH
2PSB	3GQJ	3VG8
2PSO	3GQM	4DCI
2PST	3GQS	4DLH
2PTF	3GRD	4DNH
2PV4	3GT2	4DPO
2PVZ	3GTZ	4DQA
2PW0	3GW4	4DSD
2PW6	3GX1	4DWE
2PW9	3GZR	4E0E
2PWW	3H0K	4E2G
2PYQ	3H35	4E5V
2PYT	3H3H	4E72
2PZZ	3H3L	4E9K
2Q00	3H51	4EAE
2Q02	3H6P	4EG9
2Q03	3H8U	4EGD
2Q07	3H92	4EUY
2Q0X	3H9P	4F3N
2Q17	3H9X
2Q1H	3HA4
2Q22	3HBK
2Q30	3HDG
2Q3L	3HDJ
2Q3P	3HDT
2Q3S	3HE1
2Q3T	3HFI
2Q3V	3HFQ
2Q40	3HG9
2Q44	3HHL
2Q46	3HIX
2Q47	3HK4
2Q48	3HL6
2Q4B	3HLU
2Q4D	3HLZ
2Q4K	3HN5
2Q4M	3HP7
2Q4N	3HQX
2Q4O	3HRG
2Q4P	3HRP
2Q4Q	3HSA
2Q4U	3HTR
2Q52	3HTY
2Q53	3HVZ
2Q8O	3HWU
2Q9R	3HX1
2Q9T	3HXL
2QAS	3HZE
2QAZ	3HZP
2QBW	3I0T
2QDD	3I3F
2QDR	3I3U
2QEN	3I71
2QF9	3I7T
2QG3	3I8N
2QGG	3IBM
2QGQ	3IBS
2QGS	3IBZ
2QGU	3IC5
2QGV	3IC7
2QGY	3IC8
2QH1	3IDU
2QH9	3IEE
2QHQ	3IF4
2QIK	3IJM
2QIO	3IJT
2QIP	3IKB
2QKP	3ILM
2QM0	3ILX
2QM2	3IMK
2QML	3IMO
2QMM	3IPF
2QMW	3IRB
2QNE	3IRH
2QNG	3IUK
2QNI	3IUV
2QNT	3IV0
2QNU	3IWH
2QP2	3IX7
2QPV	3JQ0
2QPX	3JR7
2QQY	3JRT
2QQZ	3JS6
2QRU	3JSR
2QS7	3JU2
2QSB	3JYS
2QSD	3JZV
2QSI	3K0Y
2QSV	3K12
2QTI	3K25
2QTP	3K29
2QU8	3K2T
2QUP	3K4I
2QV5	3K5J
2QVO	3K6E
2QVT	3K6O
2QWV	3K7C
2QX2	3K8R
2QY6	3K9R
2QYA	3KAV
2QYC	3KAW
2QYG	3KB2
2QYH	3KBY
2QYZ	3KD3
2QZ7	3KDQ
2QZB	3KDR
2QZG	3KE2
2QZI	3KE6
2R11	3KEV
2R1F	3KG4
2R39	3KGZ
2R41	3KHN
2R47	3KJJ
2R4I	3KJK
2R5R	3KK4
2R5S	3KLU
2R5X	3KNY
2R6O	3KOP
2R6S	3KQ5
2R6U	3KSP
2R84	3KVP
2R85	3KWL
2R86	3KXA
2R87	3KYE
2R8B	3KYF
2R9I	3KYG
2RA2	3KZP
2RA8	3KZT
2RA9	3L1W
2RAD	3L20
2RAQ	3L5O
2RAR	3L6I
2RAV	3L9A
2RB5	3L9T
2RB6	3LAG
2RB9	3LBB
2RBB	3LBE
2RBD	3LD7
2RBG	3LEC
2RBK	3LEQ
2RC3	3LFK
2RCD	3LFT
2RD1	3LFX
2RDC	3LJN
2RDE	3LLX
2RDM	3LM3
2RDX	3LMB
2RE2	3LMF
2RE3	3LML
2RFR	3LMM
2RG4	3LNL
2RGQ	3LNO
2RHM	3LO3
2RJB	3LOI
2RJZ	3LOQ
2RLD	3LQN
2UVK	3LUP
2UVP	3LUU
2UYJ	3LW3
2UYK	3LWC
2UYN	3LWG
2UYP	3LYD
2V1L	3LYG
2V7S	3LYW
2VH3	3LZZ
2VKJ	3M05
2VKO	3M0F
2VL7	3M1X
2VWA	3M33
2W0M	3M3I
2W56	3M4R
2WAC	3M4S
2WAM	3M6J
2WAW	3M7A
2WB7	3M92
2WE9	3MA5
2WEE	3MAB
2WM3	3MC3
2WNY	3MCX
2WZ7	3MEP
2X3D	3MER
2X3M	3MFN
2X3O	3MGJ
2X4I	3MLG
2X5Q	3MLI
2X5R	3MNF
2X7P	3MPC
2X7Q	3MQW
2XDJ	3MQZ
2XU2	3MSW
2YES	3MUQ
2YQY	3MW6
2YSK	3MX3
2YVT	3MYX
2YWA	3MZZ
2YWI	3N2Q
2YWO	3N3T
2YX5	3N6X
2YX6	3N6Y
2YXH	3N90
2YXY	3N91
2YYB	3N99
2YYO	3NA2
2YYS	3NAT
2YZI	3NEK
2YZJ	3NEU
2YZQ	3NGK
2YZS	3NHV
2YZT	3NI3
2YZY	3NJ2
2Z08	3NJC
2Z09	3NKG
2Z0J	3NLC
2Z0R	3NNG
2Z13	3NO2
2Z3V	3NPD
2Z6V	3NPG
2ZBN	3NPP
2ZBU	3NQK
2ZBV	3NQN
2ZCA	3NRF
2ZDC	3NRH
2ZDJ	3NRL
2ZFH	3NRN
2ZOM	3NRO
2ZOP	3NWZ
2ZSK	3NYM
2ZZ8	3O0L
3A2E	3O12
3AA8	3O2E
3AA9	3O2I
3AB7	3O3K
3AB8	3O3W
3AH6	3O60
3AL5	3O6U
3AL6	3O9O
3AQG	3OAO
3B42	3OBH
3B47	3OCJ
3B48	3OGI
3B49	3OHG
3B4Q	3OKX
3B4S	3OKZ
3B57	3OL3
3B5M	3OL4
3B5O	3OMD
3B5P	3OMT
3B64	3ON1
3B73	3ON2
3B76	3ONQ
3B77	3OOP
3B7C	3OOU
3B7F	3OP6
3B83	3OPN
3B8L	3OQQ
3B9C	3OT1
3B9I	3OT2
3BB5	3OV8
3BB6	3OWQ
3BB9	3OWR
3BCW	3P02
3BCY	3P42
3BDE	3P51
3BDR	3P69
3BDV	3P8A
3BDZ	3P9V
3BE0	3PE5
3BE3	3PES
3BEE	3PF0
3BEY	3PF6
3BF4	3PG5
3BFM	3PH1
3BGH	3PM7
3BGK	3POD
3BGU	3PON
3BH1	3PUB
3BHN	3Q34
3BHP	3Q4H
3BHW	3Q6C
3BID	3Q9D
3BIJ	3QFG
3BIL	3QH6
3BJS	3QH7
3BK5	3QKB
3BL4	3QOO
3BLZ	3QSG
3BM7	3QSL
3BN7	3QSZ
3BNV	3QTH
3BPD	3QUA
3BQ9	3QVO
3BQT	3R79
3BQW	3RAG
3BQX	3RD4
3BRC	3RE2
3BS4	3RH3
3BT3	3RHT
3BT5	3RMQ
3BUT	3RMS
3BUU	3RNS
3BVC	3ROB
3BWS	3RQA
3BWW	3RQB
3BY5	3RS8
3BY7	3RS9
3BYQ	3RSF
3BZ6	3RSQ
3BZB	3RSS
3C0B	3RT7
3C0F	3RT9
3C0U	3RTA
3C19	3RTC
3C2Q	3RTD
3C3F	3RTE
3C3G	3RTG
3C3H	3RU3
3C3M	3RXY
3C4N	3S25
3C4R	3S5T
3C4S	3S6S
3C5O	3S6U
3C5P	3S6V
3C6F	3S91
3C6V	3S92
3C8C	3S9J
3C8L	3S9X
3C9P	3SB1
3C9Q	3SB3
3CA8	3SBU
3CAD	3SBX
3CAX	3SD2
3CBN	3SJR
3CBW	3SLR
3CE2	3SOT
3CE8	3SOZ
3CER	3ST1
3CET	3SVF
3CEW	3SVG
3CEX	3T8K
3CFX	3T8R
3CFY	3T8T
3CFZ	3TOE
3CG1	3TP4
3CG3	3TR3
3CG4	3TU8
3CGI	3TUA
3CHV	3TWE
3CIJ	3TWF
3CIS	3TWG
3CJL	3TZG
3CJX	3U07
3CKJ	3U0I
3CKN	3U1D
3CKO	3U1V
3CKQ	3U24
3CKV	3U4T
3CLQ	3U4Y
3CLW	3U5W
3CNR	3U66
3CNU	3U6G
3CNW	3UC2
3CNX	3UN6
3CP3	3UNG
3CPG	3UPS
3CPK	3UR3
3CSX	3USH
3CTD	3UT4
3CU3	3UT7
3CUC	3UT8
3CVO	3V4H
3CWQ	3V7B
3CWV	3V7E
3CWX	3VDH
3CWY	3VG8
3CXJ	3VNP
3CY6	41245
3CYF	4DCI
3CYG	4DIU
3CYM	4DLH
3CZ9	4DM5
3CZA	4DNH
3CZB	4DPO
3D01	4DQA
3D0F	4DSD
3D0J	4DWE
3D0W	4E0E
3D19	4E2G
3D30	4E2T
3D33	4E2U
3D37	4E5V
3D3Y	4E72
3D4R	4E9K
3D54	4EAE
3D5N	4EG9
3D79	4EGD
3D7A	4EUY
3D7J	4F3N
3D7L
3D7Q
3D82
3DB7
3DB9
3DBY
3DC7
3DCA
3DCD
3DCL
3DCX
3DDE
3DEV
3DEX
3DF6
3DF7
3DFU
3DI4
3DJM
3DJW
3DKA
3DL1
3DL2
3DL3
3DLO
3DM8
3DMA
3DMC
3DME
3DMN
3DMY
3DN7
3DNH
3DNP
3DNU
3DNX
3DO8
3DO9
3DQQ
3DR5
3DRX
3DRY
3DRZ
3DS8
3DSG
3DSM
3DT5
3DTD
3DTN
3DTO
3DTZ
3DUE
3DUK
3DX5
3DXI
3DXO
3DZA
3DZM
300
3E0H
3E0S
3E0X
3E0Y
3E0Z
3E11
3E18
3E23
3E29
3E35
3E48
3E49
3E4V
3E56
3E57
3E58
3E5Z
3E61
3E8O
3E8P
3E8V
3E8X
3E98
3E9N
3EAA
3EB0
3EBR
3EBT
3EBV
3EBY
3EC6
3EC7
3EC9
3ECF
3ED5
3EDP
3EEA
3EEC
3EEQ
3EEZ
3EFG
3EGC
3EGL
3EGO
3EHC
3EHD
3EII
3EIR
3EIT
3EJA
3EJV
3ELG
3ELI
3EMM
3EN2
3EN8
3ENC
3ENH
3ENO
3EO4
3EO6
3EOF
3EOI
3EOP
3EPR
3EQZ
3ER6
3ER7
3ERM
3ERV
3ES1
3ES2
3ES4
3ESG
3ESI
3ESM
3ETN
3EU8
3EUR
3EVI
3EVY
3EW1
3EW2
3EW7
3EWB
3EWL
3EWN
3EYP
3EYT
3EZ0
3EZ1
3EZU
3EZY
3F08
3F14
3F1T
3F1Z
3F2I
3F2V
3F2Z
3F3B
3F3K
3F40
3F42
3F44
3F5D
3F7C
3F7E
3F7S
3F7W
3F7X
3F86
3F87
3F8H
3F9U
3FA5
3FAC
3FB9
3FBG
3FBQ
3FCN
3FD0
3FD9
3FDF
3FDI
3FDJ
3FDX
3FEF
3FEQ
3FEU
3FEZ
3FF0
3FF2
3FF4
3FFY
3FG8
3FG9
3FGB
3FGE
3FGG
3FGV
3FGX
3FGY
3FH0
3FH1
3FH3
3FHK
3FHM
3FIF
3FIJ
3FJ1
3FJ2
3FJS
3FJV
3FJY
3FKA
3FKQ
3FLE
3FLH
3FLJ
3FMB
3FMV
3FNJ
3FOJ
3FOK
3FOV
3FRM
3FRN
3FRW
3FSD
3FUY
3FVV
3FVW
3FX7
3FXD
3FXE
3FXH
3FY6
3FYB
3FYF
3FYN
3G0K
3G16
3G17
3G1C
3G1J
3G3L
3G6I
3G74
3G7G
3G7P
3G8Z
3GAA
3GAN
3GBY
3GDW
3GEK
3GF6
3GF8
3GFV
3GG7
3GGL
3GGM
3GGN
3GH1
3GHJ
3GI7
3GIW
3GK5
3GK6
3GKB
3GKX
3GL5
3GMG
3GMI
3GMS
3GN3
3GN6
3GNJ
3GNL
3GO4
3GOR
3GOZ
3GPI
3GQJ
3GQM
3GQS
3GRD
3GT2
3GTZ
3GUW
3GV1
3GVE
3GVZ
3GW4
3GX1
3GY9
3GYA
3GZR
3H04
3H05
3H0K
3H35
3H3E
3H3H
3H3L
3H4Q
3H51
3H6P
3H79
3H8U
3H92
3H9P
3H9W
3H9X
3HA4
3HA9
3HBK
[truncated: 551 more rows]
